# Supplementary material for: Development of a System Measurement Model of the Brazilian Hospital Accreditation System
Source: PubMed Central journal article supplement (PMC6266958; doi:10.3390/ijerph15112520), 2018-11-11
Supplement: ijerph-15-02520-s001.pdf [file ijerph-15-02520-s001.pdf]

## Supplementary Materials - Questionnaire

### Research on the Brazilian Accreditation Model

#### Part 1 - Identification

1. Name of the institution where you work:
2. What position do you hold in your organization?
3. How long have you been worked at the institution?  
(        ) 0 to 2 years    (        ) 2 to 4 years    (        ) Up to 4 years
4. In what state is the institution located?
5. What kind of service does your organization do:  
  
(        ) Ambulatory  
(        ) Hospital care  
(        ) Diagnostic Imaging, Radiotherapy and Nuclear Medicine  
(        ) Hemotherapy  
(        ) Hospital  
(        ) Laboratory  
(        ) Nephrology and Substitutive Renal Therapy  
(        ) Clothing Processing for Health Services  
(        ) Health Programs and Risk Prevention  
(        ) Ready care  
(        ) Diet Therapy Services  
(        ) Handling services
6. Size of organization - number of beds:  
(        ) Small: capacity less than 50 hospital beds;  
(        ) Medium: offers from 51 to 150 hospital beds;  
(        ) Large: offers from 151 up to 500 hospital beds;  
(        ) Special or extra cargo: it has more than 500 hospital beds;  
(        ) Other - no beds.
7. Type of organization:  
(        ) Public company  
(        ) Private company
8. Category:  
(        ) Nonprofit company  
(        ) Philanthropic company  
(        ) Nonprofit Benefit Company  
(        ) Beneficial For-Profit Company  
(        ) For-Profit Company
9. Number of employees in this organization:  
(        ) Up to 20  
(        ) 21 to 50  
(        ) 100 to 250  
(        ) 251 to 500  
(        ) Over 500.
10. Does the organization have teaching status?

- ( ) Yes  
( ) No

11. Current Accreditation Level:

- ( ) Accredited  
( ) Full accredited  
( ) Accredited with excellence  
( ) Certification seal  
( ) Not accredited / In process of accreditation

## Part 2 - Evaluating the company ...

12. The leadership team delegates activities to those who led and shares responsibilities.

- I totally disagree (1)    I strongly disagree (2)    I disagree in parts (3)    I do not agree or disagree (4)    I agree in part (5)    I strongly agree (6)    I totally agree (7)

13. The leadership team establishes the deadlines necessary to meet the quality goals for each employee.

- I totally disagree (1)    I strongly disagree (2)    I disagree in parts (3)    I do not agree or disagree (4)    I agree in part (5)    I strongly agree (6)    I totally agree (7)

14. The leadership team has the capacity to deal with mistakes and violations committed by employees, consolidating a justice culture.

- I totally disagree (1)    I strongly disagree (2)    I disagree in parts (3)    I do not agree or disagree (4)    I agree in part (5)    I strongly agree (6)    I totally agree (7)

15. The leadership team provides space for listening to divergent ideas and ideas that could make a difference in security processes.

- I totally disagree (1)    I strongly disagree (2)    I disagree in parts (3)    I do not agree or disagree (4)    I agree in part (5)    I strongly agree (6)    I totally agree (7)

16. The leadership team consistently uses the results of indicators in the decision-making process.

- I totally disagree (1)    I strongly disagree (2)    I disagree in parts (3)    I do not agree or disagree (4)    I agree in part (5)    I strongly agree (6)    I totally agree (7)

17. The leadership team evaluates the results of quality improvement actions incorporated in the organization with the participation of several authors.

- I totally disagree (1)    I strongly disagree (2)    I disagree in parts (3)    I do not agree or disagree (4)    I agree in part (5)    I strongly agree (6)    I totally agree (7)

18. The organization has a sustainable performance based on indicators.

- I totally disagree (1)    I strongly disagree (2)    I disagree in parts (3)    I do not agree or disagree (4)    I agree in part (5)    I strongly agree (6)    I totally agree (7)

19. The organization measures and assesses the risks associated with the activities performed.

- I totally disagree (1)    I strongly disagree (2)    I disagree in parts (3)    I do not agree or disagree (4)    I agree in part (5)    I strongly agree (6)    I totally agree (7)

20. The organization is committed to sustainability actions.

- I totally disagree (1)    I strongly disagree (2)    I disagree in parts (3)    I do not agree or disagree (4)    I agree in part (5)    I strongly agree (6)    I totally agree (7)

21. The organization periodically evaluates, and updates pre-established goals and objectives.

I totally disagree (1)    I strongly disagree (2)    I disagree in parts (3)    I do not agree or disagree (4)    I agree in part (5)    I strongly agree (6)    I totally agree (7)

22. The organization establishes the management of clinical processes and these processes have a positive effect on financial results.

I totally disagree (1)    I strongly disagree (2)    I disagree in parts (3)    I do not agree or disagree (4)    I agree in part (5)    I strongly agree (6)    I totally agree (7)

23. The organization develops its activities reducing the services and consumables' costs, as well as the preservation of their quality.

I totally disagree (1)    I strongly disagree (2)    I disagree in parts (3)    I do not agree or disagree (4)    I agree in part (5)    I strongly agree (6)    I totally agree (7)

24. The organization develops and evaluates results of strategic people management indicators, proposing continuous improvement.

I totally disagree (1)    I strongly disagree (2)    I disagree in parts (3)    I do not agree or disagree (4)    I agree in part (5)    I strongly agree (6)    I totally agree (7)

25. The organization has a leadership development and retention program.

I totally disagree (1)    I strongly disagree (2)    I disagree in parts (3)    I do not agree or disagree (4)    I agree in part (5)    I strongly agree (6)    I totally agree (7)

26. The organization promotes professional development through a performance evaluation tool.

I totally disagree (1)    I strongly disagree (2)    I disagree in parts (3)    I do not agree or disagree (4)    I agree in part (5)    I strongly agree (6)    I totally agree (7)

27. The organization uses information from professionals for decision-making and improvement.

I totally disagree (1)    I strongly disagree (2)    I disagree in parts (3)    I do not agree or disagree (4)    I agree in part (5)    I strongly agree (6)    I totally agree (7)

28. The organization promotes actions for the identification and retention of knowledge.

I totally disagree (1)    I strongly disagree (2)    I disagree in parts (3)    I do not agree or disagree (4)    I agree in part (5)    I strongly agree (6)    I totally agree (7)

29. The organization considers user satisfaction and this information has an impact on the performance of the organization.

I totally disagree (1)    I strongly disagree (2)    I disagree in parts (3)    I do not agree or disagree (4)    I agree in part (5)    I strongly agree (6)    I totally agree (7)

30. The organization establishes a relationship between the organizational values and the strategic deployment of the organization.

I totally disagree (1)    I strongly disagree (2)    I disagree in parts (3)    I do not agree or disagree (4)    I agree in part (5)    I strongly agree (6)    I totally agree (7)

31. The organization has the capacity to deal with errors and challenges.

I totally disagree (1)    I strongly disagree (2)    I disagree in parts (3)    I do not agree or disagree (4)    I agree in part (5)    I strongly agree (6)    I totally agree (7)

32. The organization facilitates communication between the various levels of organization.

I totally disagree (1)    I strongly disagree (2)    I disagree in parts (3)    I do not agree or disagree (4)    I agree in part (5)    I strongly agree (6)    I totally agree (7)

33. The organization implements patient-oriented actions and these actions are considered the essence of the business.

|                           |                            |                            |                                   |                        |                         |                        |
|---------------------------|----------------------------|----------------------------|-----------------------------------|------------------------|-------------------------|------------------------|
| I totally disagree<br>(1) | I strongly disagree<br>(2) | I disagree in parts<br>(3) | I do not agree or disagree<br>(4) | I agree in part<br>(5) | I strongly agree<br>(6) | I totally agree<br>(7) |
|---------------------------|----------------------------|----------------------------|-----------------------------------|------------------------|-------------------------|------------------------|

34. The organization works with cycles of continuous improvement, monitoring of indicators and monitoring targets.

|                           |                            |                            |                                   |                        |                         |                        |
|---------------------------|----------------------------|----------------------------|-----------------------------------|------------------------|-------------------------|------------------------|
| I totally disagree<br>(1) | I strongly disagree<br>(2) | I disagree in parts<br>(3) | I do not agree or disagree<br>(4) | I agree in part<br>(5) | I strongly agree<br>(6) | I totally agree<br>(7) |
|---------------------------|----------------------------|----------------------------|-----------------------------------|------------------------|-------------------------|------------------------|

35. The organization makes continuous use of quality indicators for quality measurement.

|                           |                            |                            |                                   |                        |                         |                        |
|---------------------------|----------------------------|----------------------------|-----------------------------------|------------------------|-------------------------|------------------------|
| I totally disagree<br>(1) | I strongly disagree<br>(2) | I disagree in parts<br>(3) | I do not agree or disagree<br>(4) | I agree in part<br>(5) | I strongly agree<br>(6) | I totally agree<br>(7) |
|---------------------------|----------------------------|----------------------------|-----------------------------------|------------------------|-------------------------|------------------------|

36. The organization develops hospital performance indicators as a management tool.

|                           |                            |                            |                                   |                        |                         |                        |
|---------------------------|----------------------------|----------------------------|-----------------------------------|------------------------|-------------------------|------------------------|
| I totally disagree<br>(1) | I strongly disagree<br>(2) | I disagree in parts<br>(3) | I do not agree or disagree<br>(4) | I agree in part<br>(5) | I strongly agree<br>(6) | I totally agree<br>(7) |
|---------------------------|----------------------------|----------------------------|-----------------------------------|------------------------|-------------------------|------------------------|

37. The organization has a strong role of committees and committees in monitoring the established goals and indicators.

|                           |                            |                            |                                   |                        |                         |                        |
|---------------------------|----------------------------|----------------------------|-----------------------------------|------------------------|-------------------------|------------------------|
| I totally disagree<br>(1) | I strongly disagree<br>(2) | I disagree in parts<br>(3) | I do not agree or disagree<br>(4) | I agree in part<br>(5) | I strongly agree<br>(6) | I totally agree<br>(7) |
|---------------------------|----------------------------|----------------------------|-----------------------------------|------------------------|-------------------------|------------------------|

38. The organization identifies and evaluates the existence of non-conformities in the processes and procedures performed.

|                           |                            |                            |                                   |                        |                         |                        |
|---------------------------|----------------------------|----------------------------|-----------------------------------|------------------------|-------------------------|------------------------|
| I totally disagree<br>(1) | I strongly disagree<br>(2) | I disagree in parts<br>(3) | I do not agree or disagree<br>(4) | I agree in part<br>(5) | I strongly agree<br>(6) | I totally agree<br>(7) |
|---------------------------|----------------------------|----------------------------|-----------------------------------|------------------------|-------------------------|------------------------|

39. The organization develops its care processes through a care line, reviewing the processes to correct its fragilities.

|                           |                            |                            |                                   |                        |                         |                        |
|---------------------------|----------------------------|----------------------------|-----------------------------------|------------------------|-------------------------|------------------------|
| I totally disagree<br>(1) | I strongly disagree<br>(2) | I disagree in parts<br>(3) | I do not agree or disagree<br>(4) | I agree in part<br>(5) | I strongly agree<br>(6) | I totally agree<br>(7) |
|---------------------------|----------------------------|----------------------------|-----------------------------------|------------------------|-------------------------|------------------------|

40. The organization works with a critical analysis of process controls and results analysis.

|                           |                            |                            |                                   |                        |                         |                        |
|---------------------------|----------------------------|----------------------------|-----------------------------------|------------------------|-------------------------|------------------------|
| I totally disagree<br>(1) | I strongly disagree<br>(2) | I disagree in parts<br>(3) | I do not agree or disagree<br>(4) | I agree in part<br>(5) | I strongly agree<br>(6) | I totally agree<br>(7) |
|---------------------------|----------------------------|----------------------------|-----------------------------------|------------------------|-------------------------|------------------------|

41. The organization establishes plans of action and improvements using processes and assistance protocols.

|                           |                            |                            |                                   |                        |                         |                        |
|---------------------------|----------------------------|----------------------------|-----------------------------------|------------------------|-------------------------|------------------------|
| I totally disagree<br>(1) | I strongly disagree<br>(2) | I disagree in parts<br>(3) | I do not agree or disagree<br>(4) | I agree in part<br>(5) | I strongly agree<br>(6) | I totally agree<br>(7) |
|---------------------------|----------------------------|----------------------------|-----------------------------------|------------------------|-------------------------|------------------------|

42. The organization has work processes that act as barriers to the occurrence of adverse events.

|                           |                            |                            |                                   |                        |                         |                        |
|---------------------------|----------------------------|----------------------------|-----------------------------------|------------------------|-------------------------|------------------------|
| I totally disagree<br>(1) | I strongly disagree<br>(2) | I disagree in parts<br>(3) | I do not agree or disagree<br>(4) | I agree in part<br>(5) | I strongly agree<br>(6) | I totally agree<br>(7) |
|---------------------------|----------------------------|----------------------------|-----------------------------------|------------------------|-------------------------|------------------------|

43. The organization has a committed patient safety core.

|                           |                            |                            |                                   |                        |                         |                        |
|---------------------------|----------------------------|----------------------------|-----------------------------------|------------------------|-------------------------|------------------------|
| I totally disagree<br>(1) | I strongly disagree<br>(2) | I disagree in parts<br>(3) | I do not agree or disagree<br>(4) | I agree in part<br>(5) | I strongly agree<br>(6) | I totally agree<br>(7) |
|---------------------------|----------------------------|----------------------------|-----------------------------------|------------------------|-------------------------|------------------------|

44. The organization identifies and establishes actions to mitigate risks.

|                           |                            |                            |                                   |                        |                         |                        |
|---------------------------|----------------------------|----------------------------|-----------------------------------|------------------------|-------------------------|------------------------|
| I totally disagree<br>(1) | I strongly disagree<br>(2) | I disagree in parts<br>(3) | I do not agree or disagree<br>(4) | I agree in part<br>(5) | I strongly agree<br>(6) | I totally agree<br>(7) |
|---------------------------|----------------------------|----------------------------|-----------------------------------|------------------------|-------------------------|------------------------|

45. The organization develops a plan of action for all incidents and adverse events that have been investigated.

|                           |                            |                            |                                   |                        |                         |                        |
|---------------------------|----------------------------|----------------------------|-----------------------------------|------------------------|-------------------------|------------------------|
| I totally disagree<br>(1) | I strongly disagree<br>(2) | I disagree in parts<br>(3) | I do not agree or disagree<br>(4) | I agree in part<br>(5) | I strongly agree<br>(6) | I totally agree<br>(7) |
|---------------------------|----------------------------|----------------------------|-----------------------------------|------------------------|-------------------------|------------------------|

46. In the organization, security is a set of tools to be implemented.

|                           |                            |                            |                                   |                        |                         |                        |
|---------------------------|----------------------------|----------------------------|-----------------------------------|------------------------|-------------------------|------------------------|
| I totally disagree<br>(1) | I strongly disagree<br>(2) | I disagree in parts<br>(3) | I do not agree or disagree<br>(4) | I agree in part<br>(5) | I strongly agree<br>(6) | I totally agree<br>(7) |
|---------------------------|----------------------------|----------------------------|-----------------------------------|------------------------|-------------------------|------------------------|

47. In the organization, security is solidly supported by a proactive culture.

|                           |                            |                            |                                   |                        |                         |                        |
|---------------------------|----------------------------|----------------------------|-----------------------------------|------------------------|-------------------------|------------------------|
| I totally disagree<br>(1) | I strongly disagree<br>(2) | I disagree in parts<br>(3) | I do not agree or disagree<br>(4) | I agree in part<br>(5) | I strongly agree<br>(6) | I totally agree<br>(7) |
|---------------------------|----------------------------|----------------------------|-----------------------------------|------------------------|-------------------------|------------------------|

48. The organization encourages waste reduction, process optimization, quality and technical assistance.

|                           |                            |                            |                                   |                        |                         |                        |
|---------------------------|----------------------------|----------------------------|-----------------------------------|------------------------|-------------------------|------------------------|
| I totally disagree<br>(1) | I strongly disagree<br>(2) | I disagree in parts<br>(3) | I do not agree or disagree<br>(4) | I agree in part<br>(5) | I strongly agree<br>(6) | I totally agree<br>(7) |
|---------------------------|----------------------------|----------------------------|-----------------------------------|------------------------|-------------------------|------------------------|

49. The organization promotes the reduction of problems caused by medical errors.

|                           |                            |                            |                                   |                        |                         |                        |
|---------------------------|----------------------------|----------------------------|-----------------------------------|------------------------|-------------------------|------------------------|
| I totally disagree<br>(1) | I strongly disagree<br>(2) | I disagree in parts<br>(3) | I do not agree or disagree<br>(4) | I agree in part<br>(5) | I strongly agree<br>(6) | I totally agree<br>(7) |
|---------------------------|----------------------------|----------------------------|-----------------------------------|------------------------|-------------------------|------------------------|

50. The organization establishes the evolution of the quality of the services provided after the accreditation process.

|                           |                            |                            |                                   |                        |                         |                        |
|---------------------------|----------------------------|----------------------------|-----------------------------------|------------------------|-------------------------|------------------------|
| I totally disagree<br>(1) | I strongly disagree<br>(2) | I disagree in parts<br>(3) | I do not agree or disagree<br>(4) | I agree in part<br>(5) | I strongly agree<br>(6) | I totally agree<br>(7) |
|---------------------------|----------------------------|----------------------------|-----------------------------------|------------------------|-------------------------|------------------------|

51. The organization has an environment where the employee feels more motivated by accreditation.

|                           |                            |                            |                                   |                        |                         |                        |
|---------------------------|----------------------------|----------------------------|-----------------------------------|------------------------|-------------------------|------------------------|
| I totally disagree<br>(1) | I strongly disagree<br>(2) | I disagree in parts<br>(3) | I do not agree or disagree<br>(4) | I agree in part<br>(5) | I strongly agree<br>(6) | I totally agree<br>(7) |
|---------------------------|----------------------------|----------------------------|-----------------------------------|------------------------|-------------------------|------------------------|
